# Supplementary material
Source: ML conference proceedings conference paper supplement (https://openaccess.thecvf.com/content/CVPR_2020/html/Henzler_Learning_a_Neural_CVPR_2020_paper.html)
Supplement: Supplementary file 1 [file Henzler_Learning_a_Neural_CVPR_2020_supplemental.zip]

# Supplemental: Learning a Neural 3D Texture Space from 2D Exemplars

## 1. Network Architecture

### 1.1. Encoder

The architecture for the encoder network remains consistent for both ours and competitor methods. Depending on training for *space*, *single*, *w/o transform* the parameter N changes accordingly.

Table 1. Network architecture for encoder.

| Layer    | Kernel | Activation | Shape          | # params |
|----------|--------|------------|----------------|----------|
| Input    | —      | —          | 3 x 128 x 128  | —        |
| Conv     | 3x3    | IN+LReLU   | 32 x 128 x 128 | ~1k      |
| Conv     | 4x4    | IN+LReLU   | 64 x 64 x 64   | ~32k     |
| Conv     | 4x4    | IN+LReLU   | 128 x 32 x 32  | ~130k    |
| Conv     | 4x4    | IN+LReLU   | 256 x 16 x 16  | ~524k    |
| Conv     | 4x4    | IN+LReLU   | 256 x 8 x 8    | ~1M      |
| Conv     | 4x4    | IN+LReLU   | 256 x 4 x 4    | ~1M      |
| Linear   | —      | —          | 8              | ~32k     |
| Linear   | —      | —          | N              | ~0.5k    |
| # params | —      | —          |                | ~2.8M    |

### 1.2. Sampler

The sampler architecture used for both our and the *mlp* [1] method consists of following convolutional architecture with 1x1 kernels emulating Linear layers:

Table 2. Network architecture for sampler.

| Layer    | Kernel | Activation | Shape           | # params |
|----------|--------|------------|-----------------|----------|
| Input    | —      | —          | N x 128 x 128   | —        |
| Conv     | 1x1    | ReLU       | 128 x 128 x 128 | ~10k     |
| Conv     | 1x1    | ReLU       | 128 x 128 x 128 | ~16.5k   |
| Conv     | 1x1    | ReLU       | 128 x 128 x 128 | ~16.5k   |
| Conv     | 1x1    | ReLU       | 128 x 128 x 128 | ~16.5k   |
| Conv     | 1x1    | ReLU       | 128 x 128 x 128 | ~16.5k   |
| Conv     | 1x1    | ReLU       | 3 x 128 x 128   | ~400     |
| # params | —      | —          |                 | ~77k     |

### 1.3. CNN

For *cnn* and *cnnD* competitors we use a similar architecture to the proposed method of [2]:

Table 3. Network architecture for convolutional methods.

| Layer    | Kernel | Activation | Shape          | # params |
|----------|--------|------------|----------------|----------|
| Input    | —      | —          | (32) + 256     | —        |
| Linear   | —      | —          | (32) + 256     | ~80k     |
| Linear   | —      | —          | 256            | ~70k     |
| Reshape  | —      | —          | 16 x 4 x 4     | —        |
| ConvT    | 4x4    | ReLU       | 128 x 8 x 8    | ~32k     |
| ConvT    | 4x4    | ReLU       | 128 x 16 x 16  | ~260k    |
| ConvT    | 4x4    | ReLU       | 128 x 32 x 32  | ~260k    |
| Upsample | —      | —          | 128 x 64 x 64  | —        |
| Conv     | 3x3    | ReLU       | 64 x 64 x 64   | ~70k     |
| Upsample | —      | —          | 64 x 128 x 128 | —        |
| Conv     | 3x3    | ReLU       | 3 x 128 x 128  | ~2k      |
| # params | —      | —          |                | ~790k    |

## 2. Results

Additional results are displayed below. Furthermore, a webpage containing more results for all four classes (WOOD, MARBLE, GRASS and RUST) including competitors can be accessed online: <https://geometry.cs.ucl.ac.uk/projects/2020/neuraltexture>. Videos of rotating shapes textured by our method can be found in the *videos* folder.

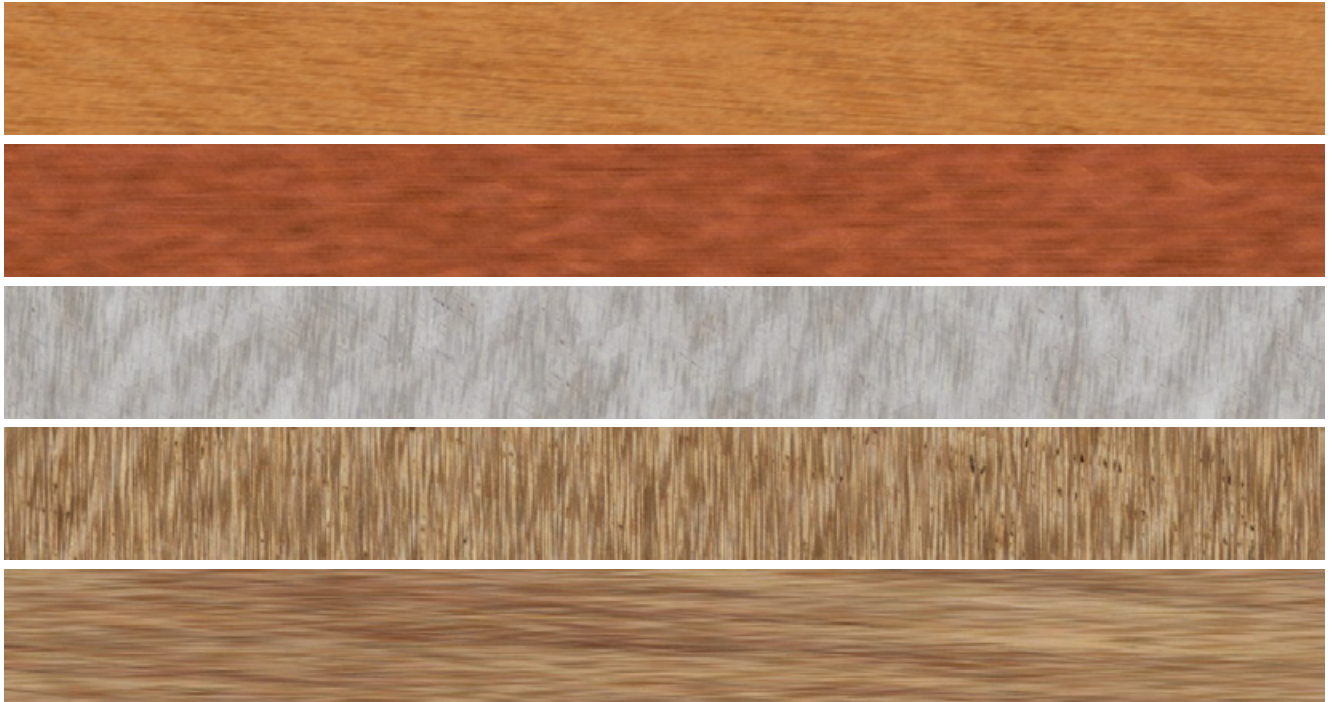

Figure 1. Results derived from the encoded WOOD space.

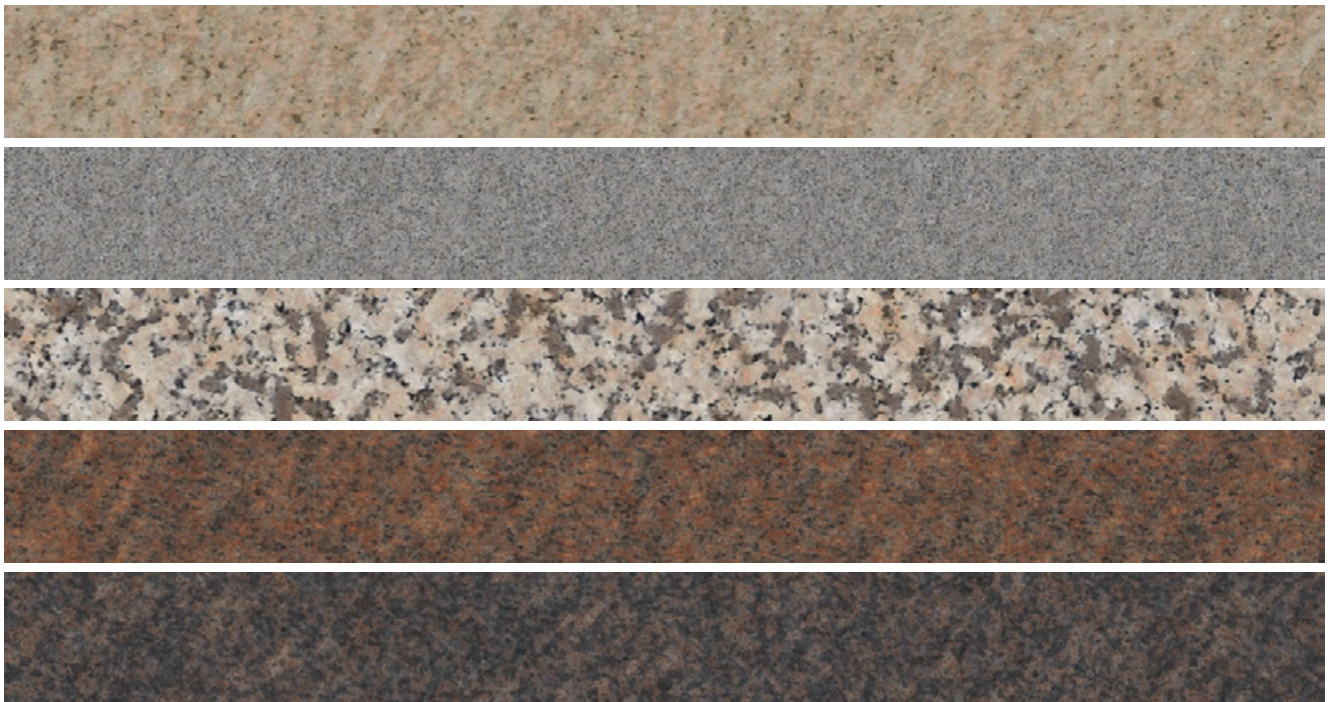

Figure 2. Results derived from the encoded MARBLE space.



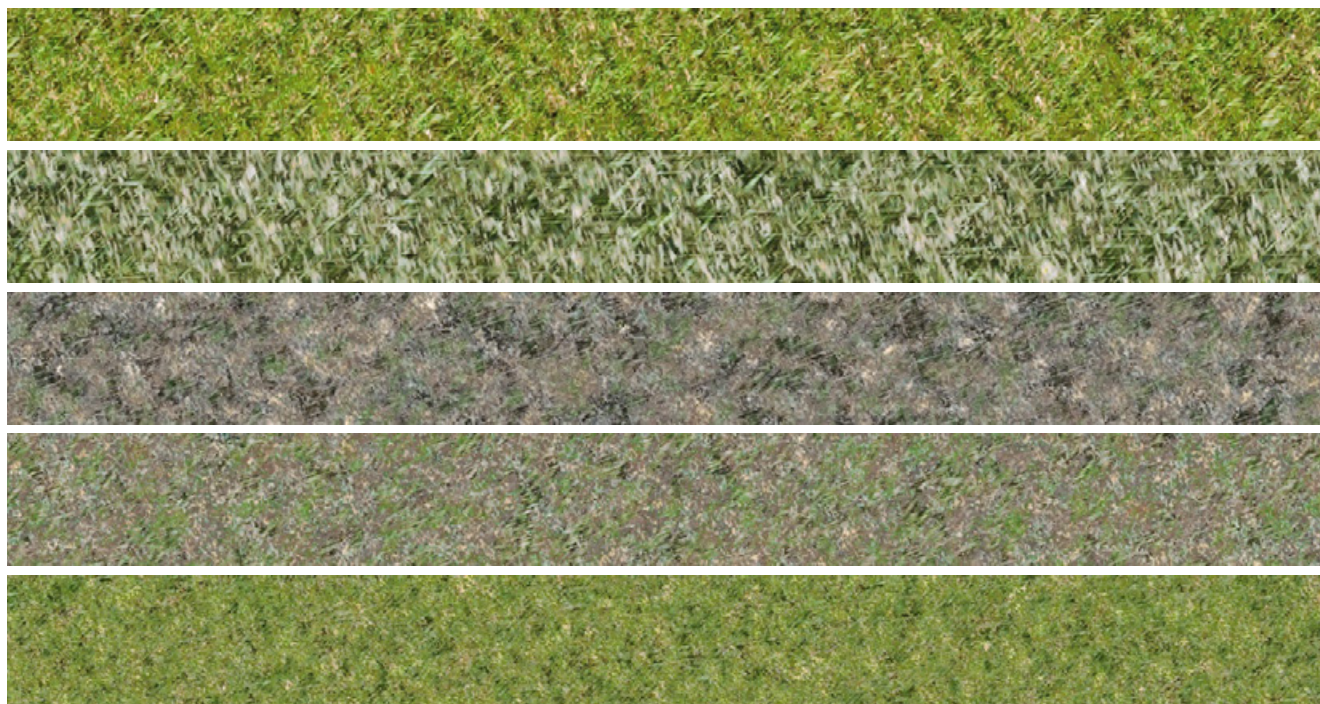

Figure 3. Results derived from the encoded GRASS space.

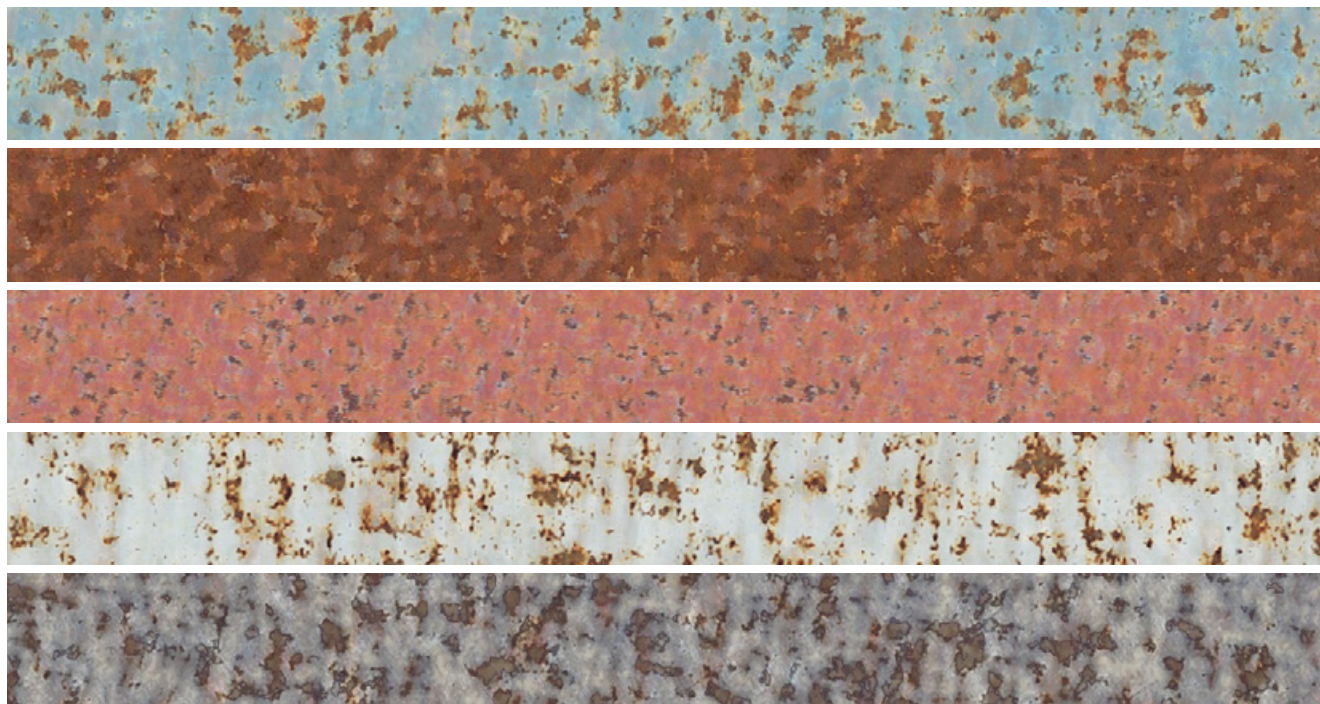

Figure 4. Results derived from the encoded RUST space.



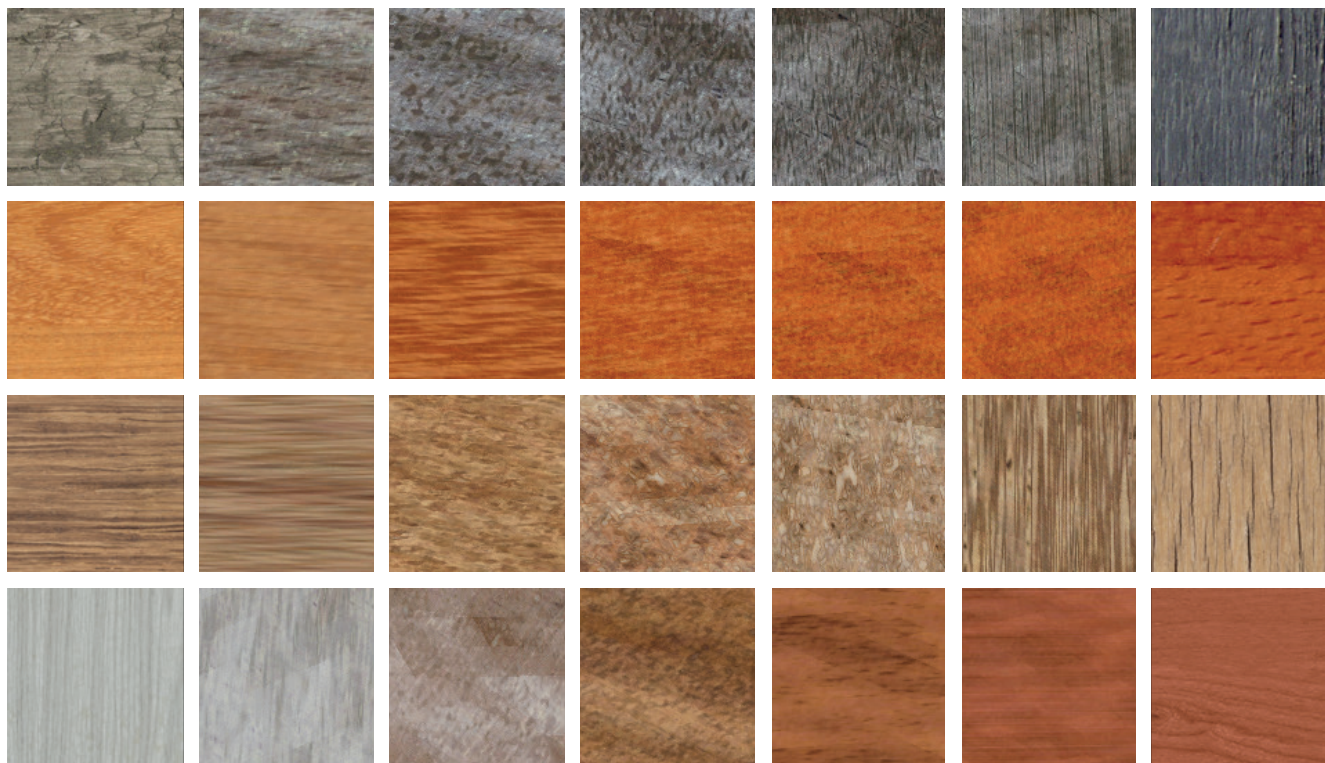

Figure 5. Latent space interpolation from one ground truth wood exemplar (left) into secondary ground truth exemplar (right). Each row corresponds to independent interpolations.

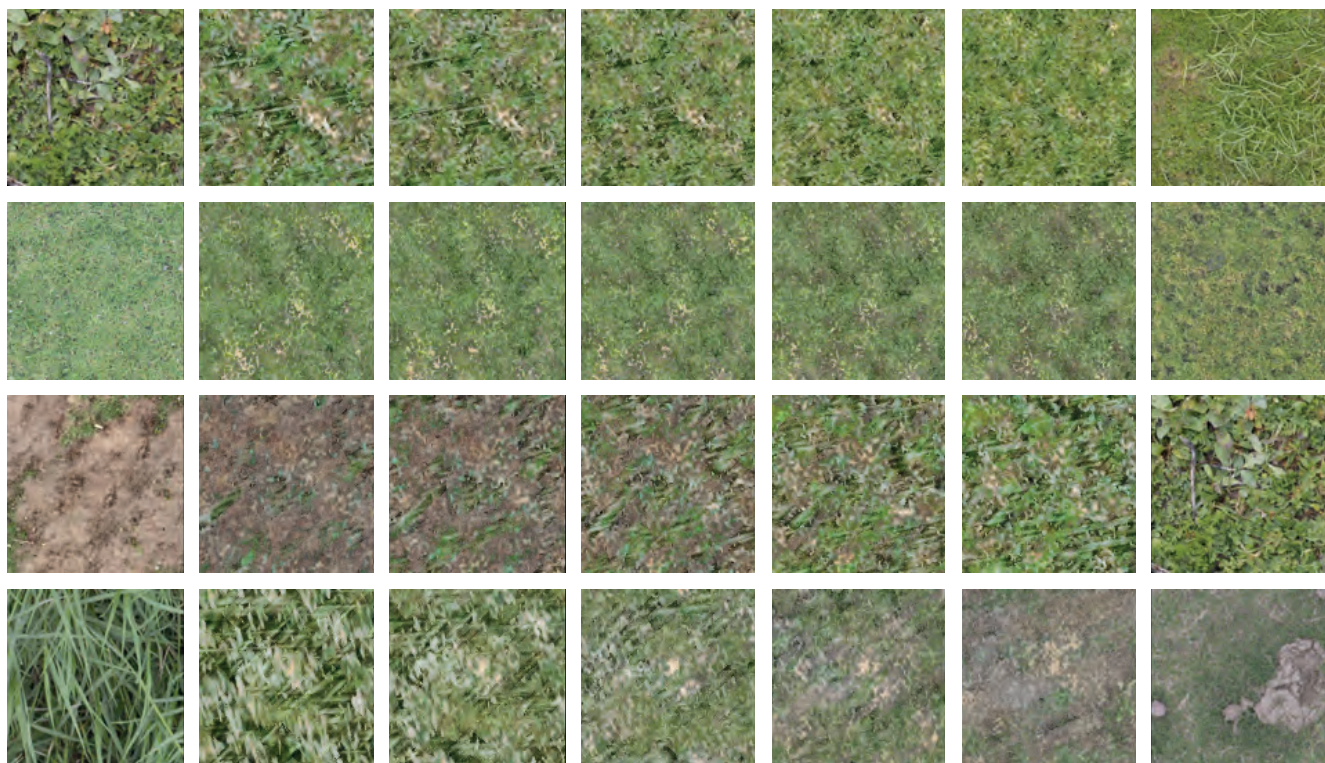

Figure 6. Latent space interpolation from one ground truth grass exemplar (left) into secondary ground truth exemplar (right). Each row corresponds to independent interpolations.



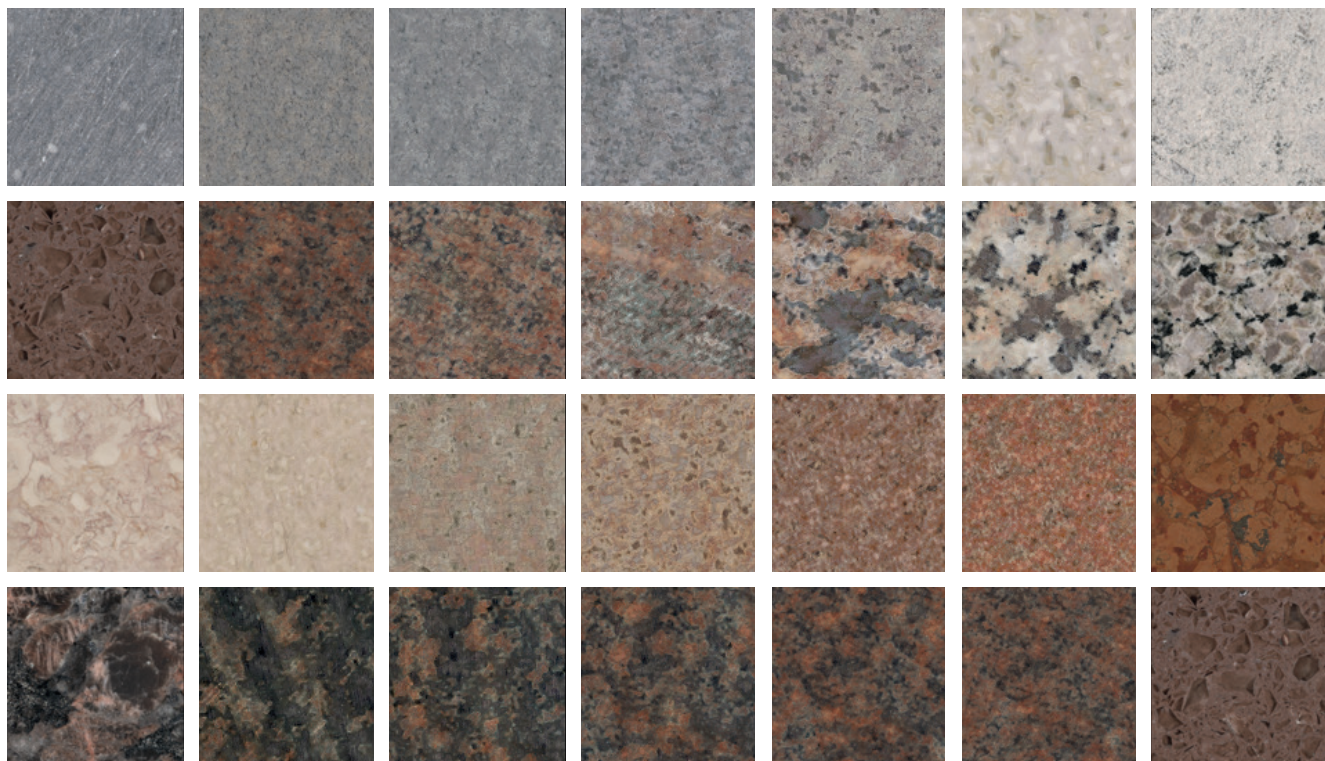

Figure 7. Latent space interpolation from one ground truth marble exemplar (left) into secondary ground truth exemplar (right). Each row corresponds to independent interpolations.

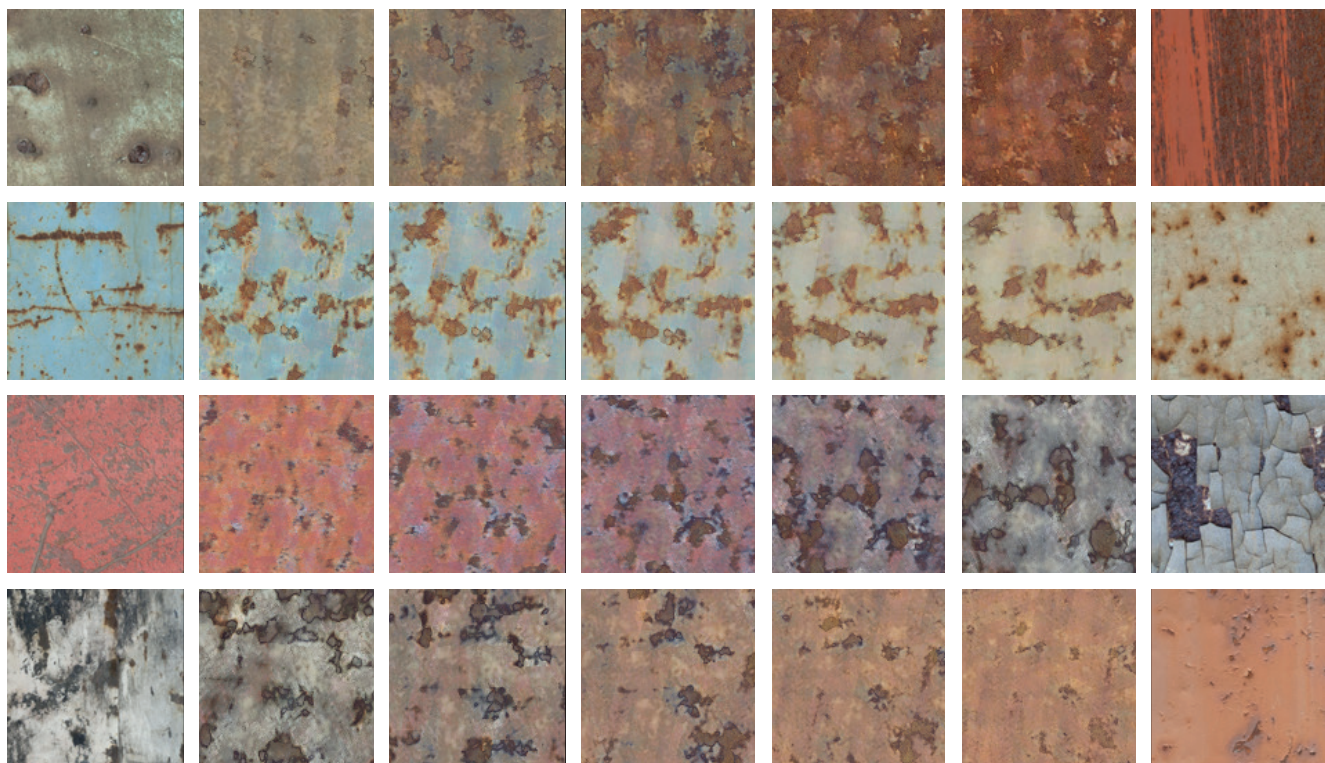

Figure 8. Latent space interpolation from one ground truth rust exemplar (left) into secondary ground truth exemplar (right). Each row corresponds to independent interpolations.

## References

- [1] Michael Oechsle, Lars Mescheder, Michael Niemeyer, Thilo Strauss, and Andreas Geiger. Texture fields: Learning texture representations in function space. In *ICCV*, 2019. [1](#)
- [2] Dmitry Ulyanov, Andrea Vedaldi, and Victor Lempitsky. Improved texture networks: Maximizing quality and diversity in feed-forward stylization and texture synthesis. In *CVPR*, 2017. [1](#)
